# Supplementary material for: Synergistic coupling of NiVAl-layered double hydroxide with few-layered Ti3C2Tx–MXene nanosheets for superior asymmetric supercapacitor performance
Source: Royal Society of Chemistry journal article supplement (doi:10.1039/d3tc03014h), 2023-01-01
Supplement: d3tc03014h1.pdf [file d3tc03014h1.pdf]

# Supporting Information for

## Synergistically coupling of NiVAl layered double hydroxide with few-layer $\text{Ti}_3\text{C}_2\text{T}_x$ -MXene nanosheets for superior asymmetric supercapacitor

Xinsheng Zhou<sup>1, a</sup>, Zhuoran Hou<sup>1, a</sup>, Hua-Yu Zhang\*<sup>a</sup>, Jie Yu<sup>a</sup>

<sup>a</sup> Guangdong Provincial Key Laboratory of Semiconductor Optoelectronic Materials and Intelligent Photonic Systems, School of Materials Science and Engineering, Harbin Institute of Technology (Shenzhen), Shenzhen 518055, PR China

\* Corresponding author.

Email: hyzhang@hit.edu.cn

<sup>1</sup> These authors contributed equally to this work.

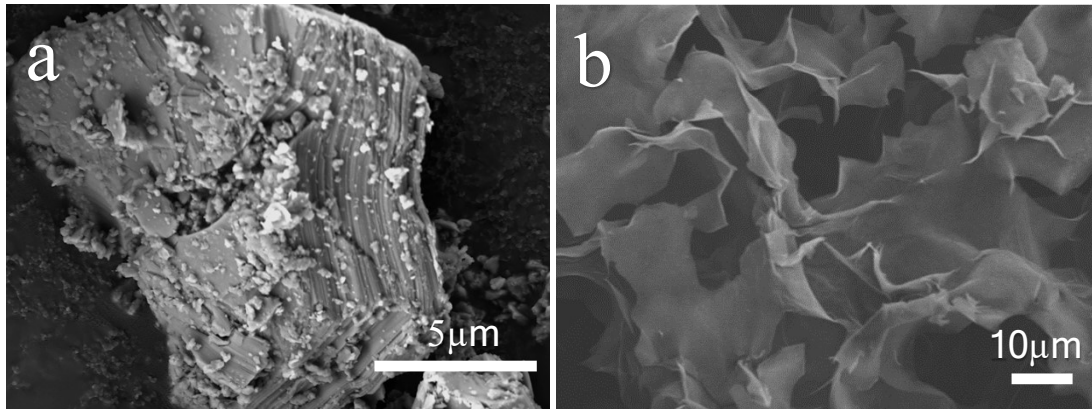

**Fig. S1.** SEM images of (a)  $Ti_3AlC_2$ , (b)  $Ti_3C_2T_x$ -MXene.

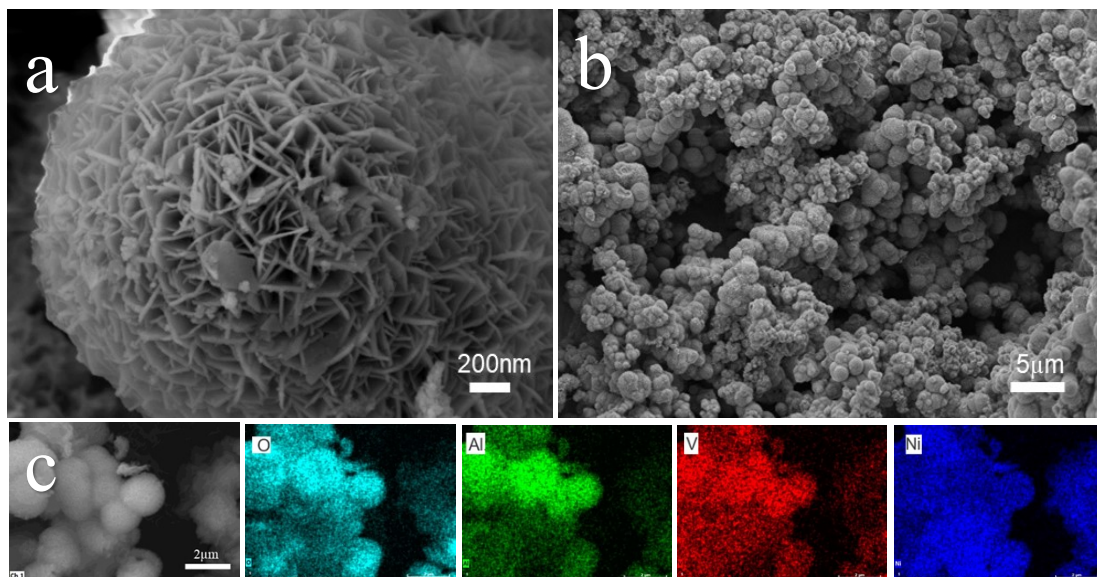

**Fig. S2.** SEM images of (a) NiVAI-LDH at high magnification, (b) NiVAI-LDH at low magnification, (c) EDS mapping of O, Al, V and Ni.

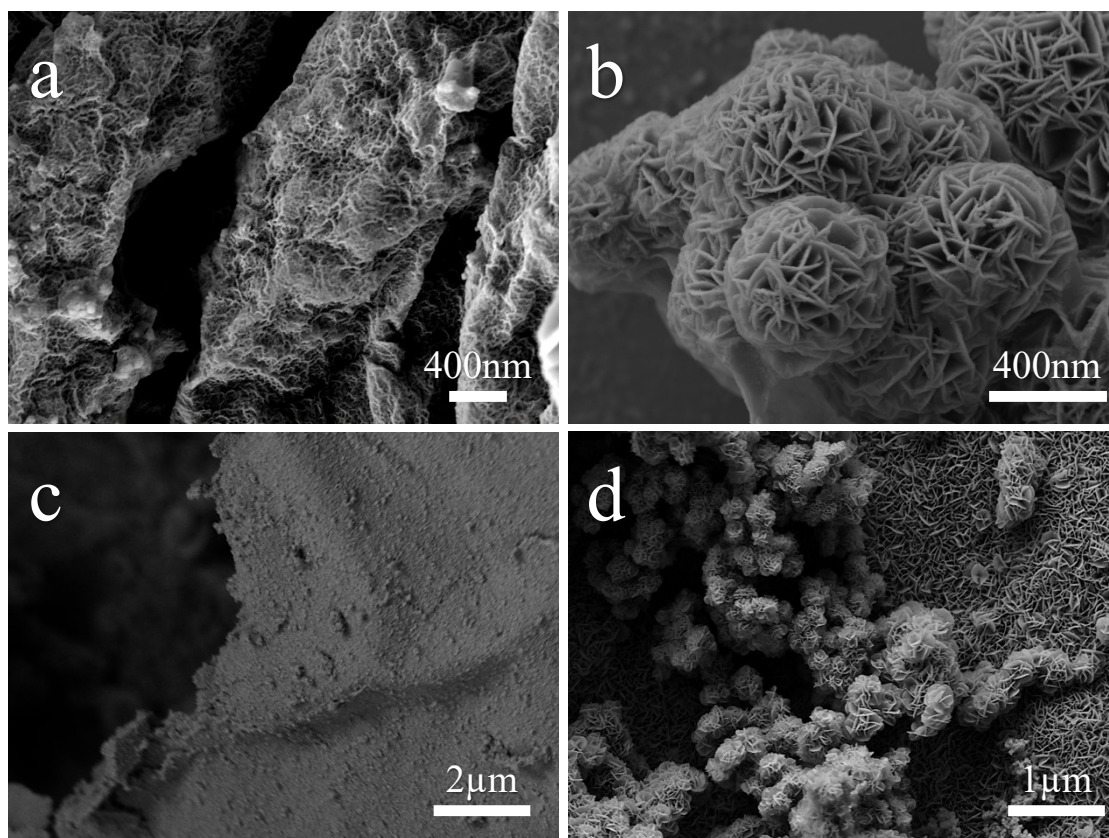

**Fig. S3.** SEM images of (a)  $\text{Ti}_3\text{C}_2\text{T}_x\text{-MXene/NiVAI-LDH(1:1)}$  at high magnification, (b)  $\text{Ti}_3\text{C}_2\text{T}_x\text{-MXene/NiVAI-LDH(1:8)}$  at high magnification, (c)  $\text{Ti}_3\text{C}_2\text{T}_x\text{-MXene/NiVAI-LDH(1:1)}$  at high magnification, (d)  $\text{Ti}_3\text{C}_2\text{T}_x\text{-MXene/NiVAI-LDH(1:8)}$  at low magnification.

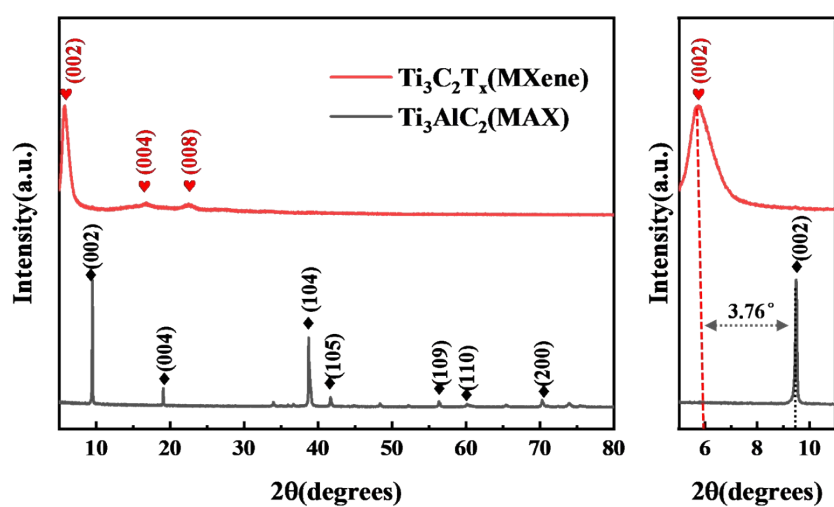

**Fig. S4.** The XRD pattern of  $\text{Ti}_3\text{AlC}_2$  and  $\text{Ti}_3\text{C}_2\text{T}_x\text{-MXene}$ .

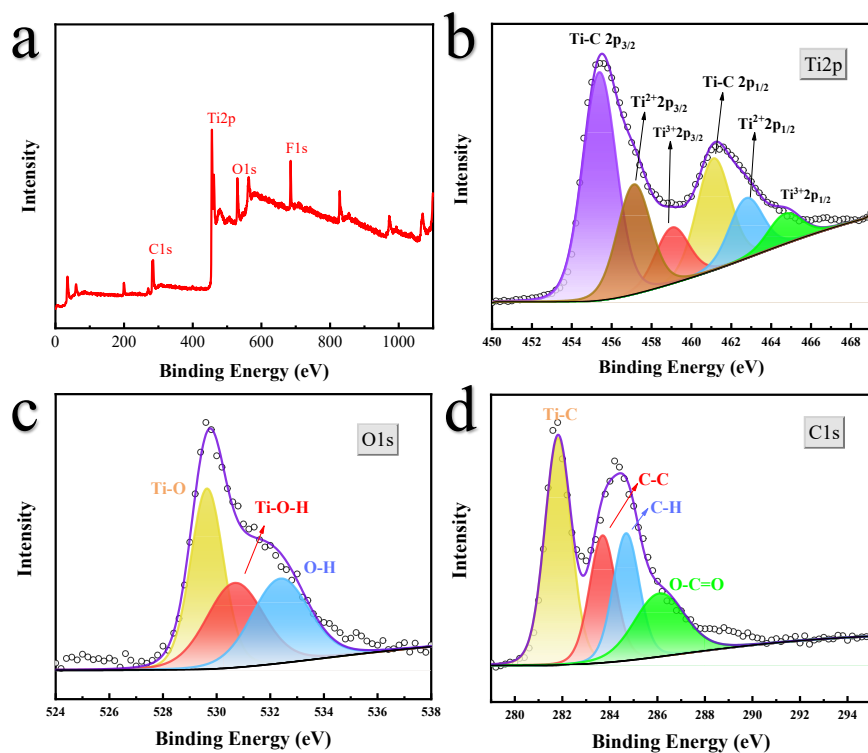

**Fig. S5.** (a) The XPS survey spectrum of  $\text{Ti}_3\text{C}_2\text{T}_x\text{-MXene}$ , (b) Ti 2p, (c) O 1s and (d) C 1s high-resolution XPS spectra of  $\text{Ti}_3\text{C}_2\text{T}_x\text{-MXene}$ .

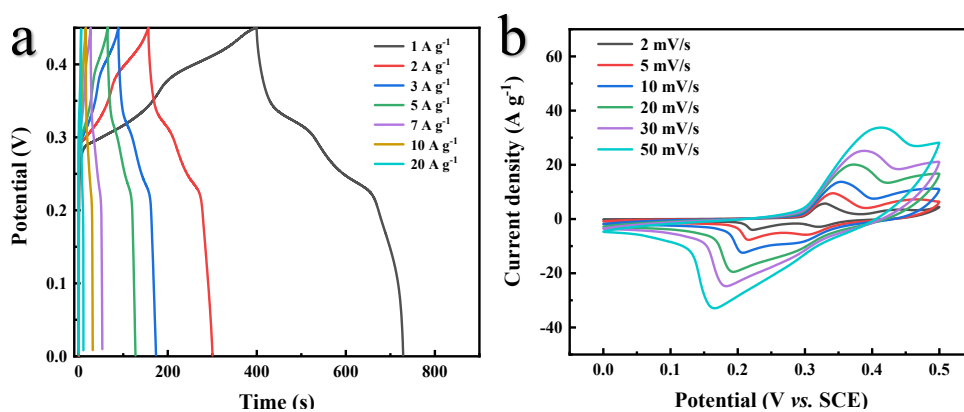

**Fig. S6.** (a) CV curves of NiAl-LDH at different scan rates, (b) GCD curves of NiAl-LDH at different current densities.

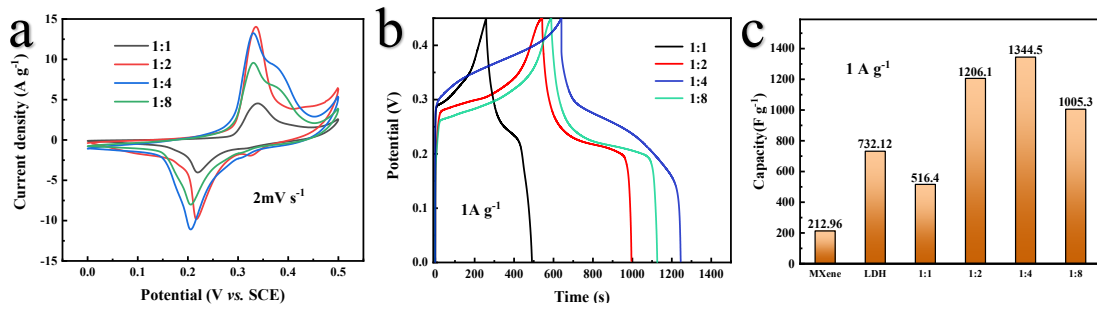

**Fig. S7.** (a) CV curves of different samples at scan rate of 2 mV s<sup>-1</sup>. (d) GCD curves of different samples at current density of 1 A g<sup>-1</sup>. (c) Histogram of the specific capacitance of different samples.

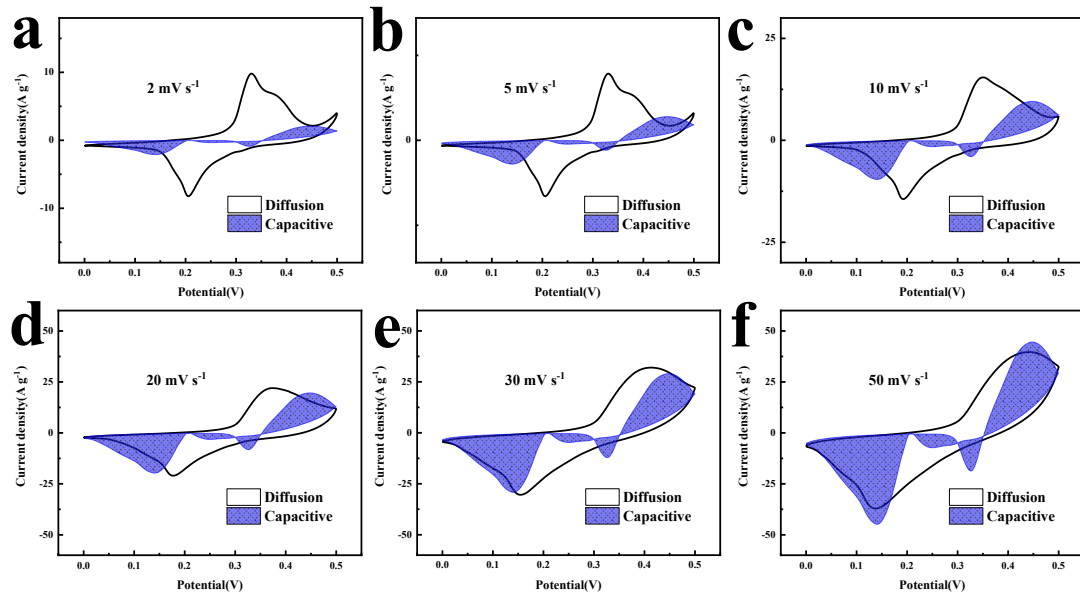

**Fig. S8.** CV of capacitive-controlled and diffusion-controlled contributions for Ti<sub>3</sub>C<sub>2</sub>T<sub>x</sub>-MXene/NiVAI-LDH at different scanning rates.

**Table. S1.** The specific  $R_s$  and  $R_{ct}$  values ( $\Omega$ ) of  $Ti_3C_2T_x$ -MXene, NiVAl-LDH and $Ti_3C_2T_x$ -MXene/NiVAl-LDH

| Samples                       | $R_s$ | $R_{ct}$ |
|-------------------------------|-------|----------|
| $Ti_3C_2T_x$ -MXene           | 1.01  | 0.56     |
| NiVAl-LDH                     | 2.01  | 0.98     |
| $Ti_3C_2T_x$ -MXene/NiVAl-LDH | 1.29  | 0.49     |

**Table. S2.** Electrochemical performances of  $Ti_3C_2T_x$ -MXene/NiVAl-LDH and

relevant electrode materials

| Electrode materials                                     | KOH electrolyte       | Specific capacitance                             | Cycle retention                             | Ref.      |
|---------------------------------------------------------|-----------------------|--------------------------------------------------|---------------------------------------------|-----------|
| $Ti_3C_2T_x$ -MXene/NiVAl-LDH                           | 1 mol L <sup>-1</sup> | 186.7 mAh g <sup>-1</sup> (1 A g <sup>-1</sup> ) | 84.7% (5000 cycles, 10 A g <sup>-1</sup> )  | This work |
| NiMn-LDH                                                | 6 mol L <sup>-1</sup> | 527 F g <sup>-1</sup> (1 A g <sup>-1</sup> )     | 91.2% (5000 cycles, 2 A g <sup>-1</sup> )   | 1         |
| C-NiMn-1                                                | 1 mol L <sup>-1</sup> | 870 F g <sup>-1</sup> (1 A g <sup>-1</sup> )     | 89.9% (5000 cycles, 0.5 A g <sup>-1</sup> ) | 2         |
| MXene/NiCoFe-LDH                                        | 1 mol L <sup>-1</sup> | 1305 F g <sup>-1</sup> (1 A g <sup>-1</sup> )    | 85.7% (6000 cycles, 10 A g <sup>-1</sup> )  | 3         |
| CNTs@NiCo-LDH//ZIF-8                                    | 1 mol L <sup>-1</sup> | 176 mAh g <sup>-1</sup> (1 A g <sup>-1</sup> )   | 90.22% (5200 cycles, 10 A g <sup>-1</sup> ) | 4         |
| NiCoAl-LDH/V <sub>4</sub> C <sub>3</sub> T <sub>x</sub> | 1 mol L <sup>-1</sup> | 627 C g <sup>-1</sup> (1 A g <sup>-1</sup> )     | 98.0% (10000 cycles, 20 A g <sup>-1</sup> ) | 5         |
| G-NiMnLDH                                               | 2 mol L <sup>-1</sup> | 1108 F g <sup>-1</sup> (1 A g <sup>-1</sup> )    | 78% (3000 cycles, 15 A g <sup>-1</sup> )    | 6         |
| FeNi-LDH/Ti <sub>3</sub> C <sub>2</sub> T <sub>x</sub>  | 1 mol L <sup>-1</sup> | 922.6 F g <sup>-1</sup> (1 A g <sup>-1</sup> )   | 88% (10000 cycles, 3 A g <sup>-1</sup> )    | 7         |
| NiMoO <sub>4</sub> /NiCo-LDH                            | 1 mol L <sup>-1</sup> | 153.7 mAh g <sup>-1</sup> (1 A g <sup>-1</sup> ) | 80% (5000 cycles, 1 A g <sup>-1</sup> )     | 8         |
| CoNi <sub>2</sub> S <sub>4</sub> /CoNi-LDH              | 1 mol L <sup>-1</sup> | 184 mAh g <sup>-1</sup> (2 A g <sup>-1</sup> )   | 95.9% (10000 cycles, 1 A g <sup>-1</sup> )  | 9         |
| NiCo-LDH@AgNW                                           | 1 mol L <sup>-1</sup> | 115 mAh g <sup>-1</sup> (0.2 A g <sup>-1</sup> ) | 75.9% (5000 cycles, 1 A g <sup>-1</sup> )   | 10        |

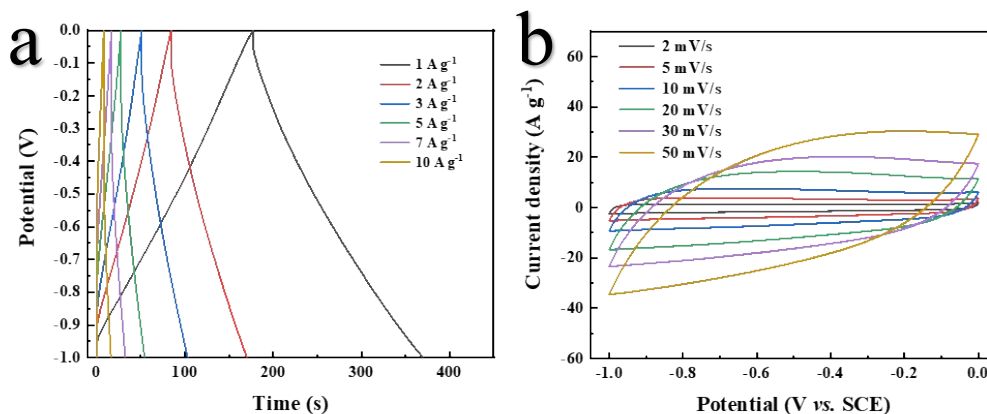

**Fig. S9.** (a) CV curves of AC at different scan rates, (b) GCD curves of AC at different current densities.

## References

1. M. M. Baig, I. H. Gul, R. Ahmad, S. M. Baig, M. Z. Khan and N. Iqbal, *J. Mater. Sci.*, 2021, **56**, 18636-18649.
2. Q. Shan, W. Huo, M. Shen, C. Jing, Y. Peng, H. Pu and Y. Zhang, *Chin. Chem. Lett.*, 2020, **31**, 2245-2248.
3. T. Yang, J. Ye, S. Chen, S. Liao, H. Chen, L. Yang, X. Xu and F. Wang, *Electrochim. Acta*, 2020, **362**, 137081.
4. F. Zhu, W. Liu, Y. Liu and W. Shi, *Chem. Eng. J.*, 2020, **383**, 123150.
5. X. Wang, H. Li, H. Li, S. Lin, J. Bai, J. Dai, C. Liang, X. Zhu, Y. Sun and S. Dou, *J. Mater. Chem. A*, 2019, **7**, 2291-2300.
6. Y. Yang, X. Xu, W. Li, Y. Huang, J. Jiang, L. He, M. Jing, Y. Bai, T. Wu, G. Fang, Y. Yang and X. Wang, *Appl. Surf. Sci.*, 2023, **611**, 155562.

7. R. Zhang, J. Dong, W. Zhang, L. Ma, Z. Jiang, J. Wang and Y. Huang, *Nano Energy*, 2022, **91**, 106633.
8. S. Cui, Q. Hu, K. Sun, X. Wang, F. Wang, H. A. Hamouda, H. Peng and G. Ma, *ACS Appl. Nano Mater.*, 2022, **5**, 6181-6191.
9. A. Siddiqa, N. D. H and M. Padaki, *Energy Fuels*, 2022, **36**, 13286-13295.
10. X. Xuan, M. Qian, L. Pan, T. Lu, Y. Gao, L. Han, L. Wan, Y. Niu and S. Gong, *J. Energy Chem.*, 2022, **70**, 593-603.
